# Supplementary material for: Sensing and imaging of PPi in vivo using lanthanide-based second near-infrared luminescent probes
Source: Royal Society of Chemistry journal article supplement (doi:10.1039/d1tb02579a), 2022-01-01
Supplement: d1tb02579a1.pdf [file d1tb02579a1.pdf]

**Supporting information for**

**Sensing and Imaging of PPI *in vivo* using Lanthanide-based**

**Second Near-infrared Luminescent Probes**

Yaoquan Su <sup>a</sup>, Lingyue Ye <sup>a</sup>, Jiayu Gu <sup>a</sup>, Lingzhi Zhao <sup>\*a</sup>, Yunyun Zhou <sup>\*a</sup> and  
Juanjuan Peng <sup>\*a</sup>

<sup>a</sup> State Key Laboratory of Natural Medicine, the School of Basic Medical Sciences and Clinical  
Pharmacy, China Pharmaceutical University, Nanjing, Jiangsu 211198, China. Email:  
[pjj@cpu.edu.cn](mailto:pjj@cpu.edu.cn); [zhouyy@cpu.edu.cn](mailto:zhouyy@cpu.edu.cn); [zlj@cpu.edu.cn](mailto:zlj@cpu.edu.cn)

## Contents

|                                                           |         |
|-----------------------------------------------------------|---------|
| The characterizations of TA/Fe <sup>3+</sup> -DCNPs ..... | S2-S7   |
| The luminescence change of probe to PPI .....             | S7-S13  |
| The mechanisms study of the probe for PPI detection ..... | S14-S16 |
| PPI detection and safety study <i>in vivo</i> .....       | S17     |

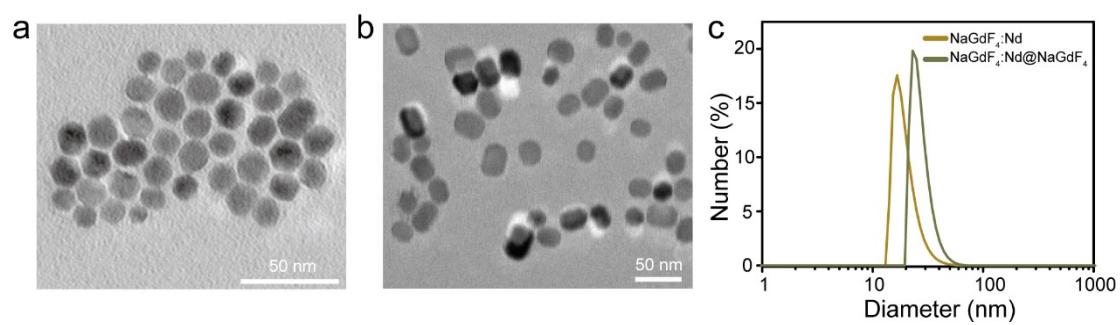

**Fig. S1** The TEM images of (a) NaGdF<sub>4</sub>:Nd and (b) NaGdF<sub>4</sub>:Nd@NaGdF<sub>4</sub>. (c) The size distribution of NaGdF<sub>4</sub>:Nd and NaGdF<sub>4</sub>:Nd@NaGdF<sub>4</sub> measured by the DLS method.

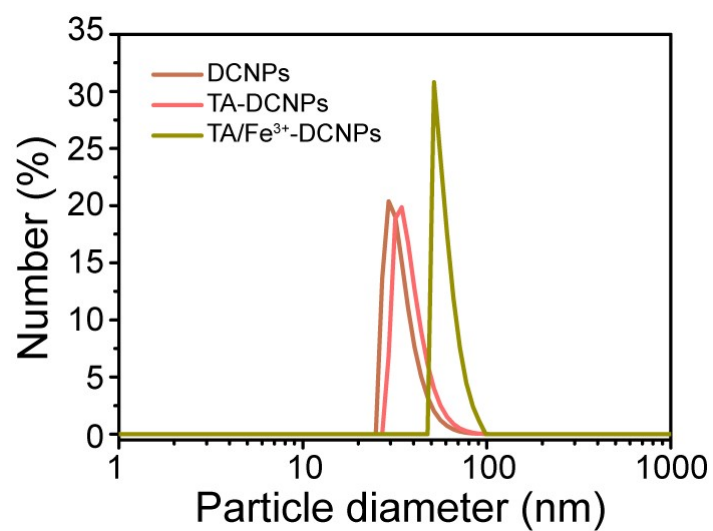

**Fig. S2** Dynamic light scattering measurements of DCNPs, TA-DCNPs and TA/Fe<sup>3+</sup>-DCNPs.

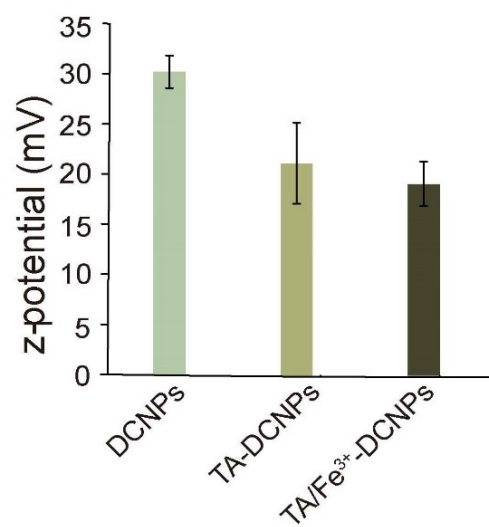

**Fig. S3** The  $\xi$ -potentials of DCNP, TA-DCNPs, TA/ Fe<sup>3+</sup>-DCNPs.

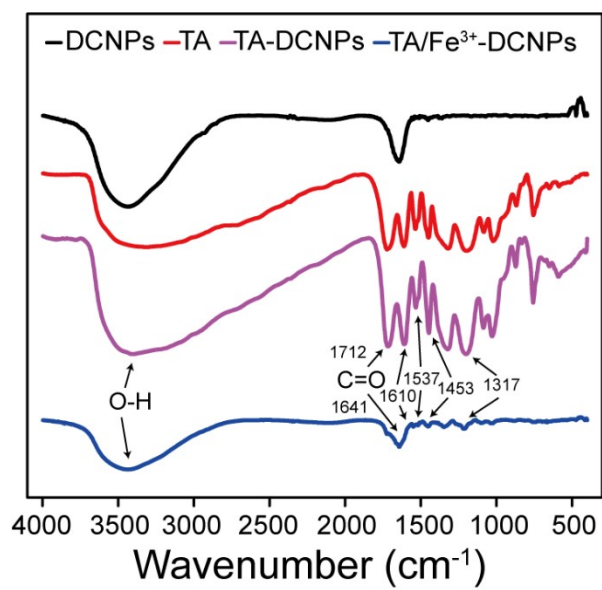

**Fig. S4** The FI-IR spectra of DCNPs, TA, TA-DCNPs and TA/Fe<sup>3+</sup>-DCNPs.

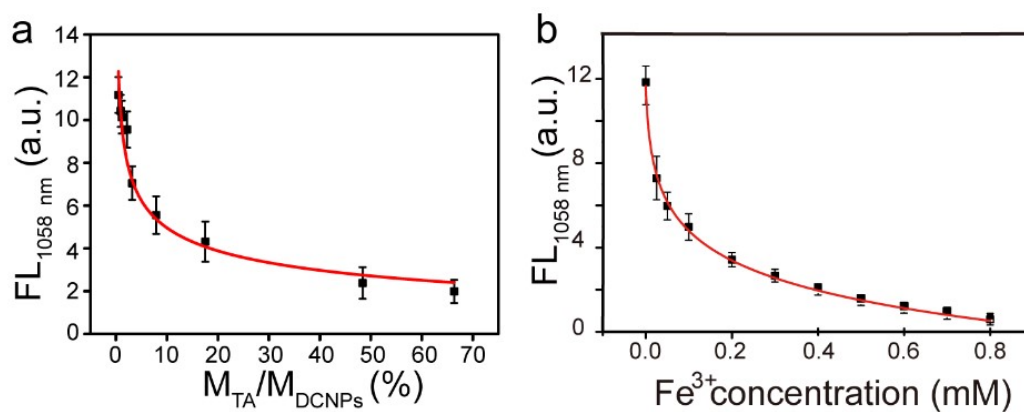

**Fig. S5** (a) Plot of luminescence intensity at 1058 nm against the different mass ratio of TA:DCNPs (b) Plot of luminescence intensity at 1058 nm against the  $Fe^{3+}$  concentration ( $n = 5$ ). The line joining the data points are the guide to the eye only.

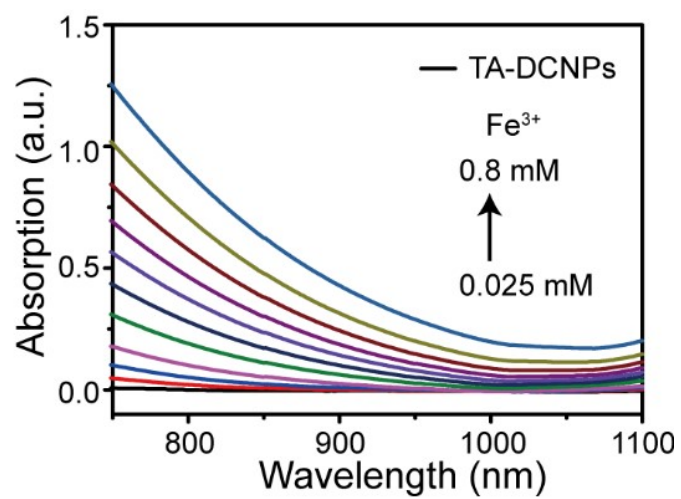

**Fig. S6** The UV-vis spectra of TA-DCNPs at different concentration of  $\text{Fe}^{3+}$ .

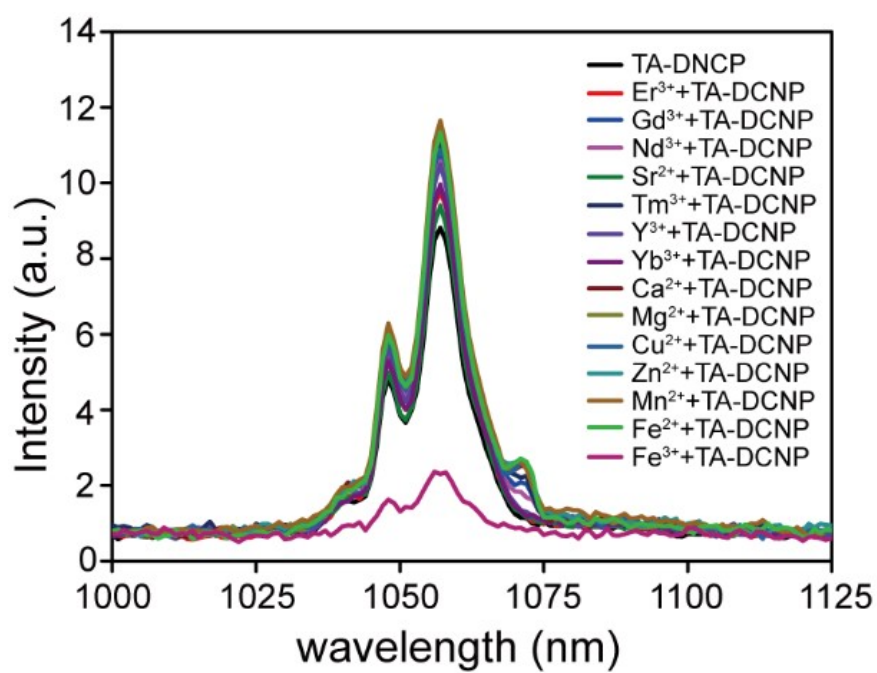

**Fig. S7** The luminescence spectra of TA-DCNPs ( $0.2 \text{ mg} \cdot \text{mL}^{-1}$ ) with different ions in PBS buffer (pH=7.2).

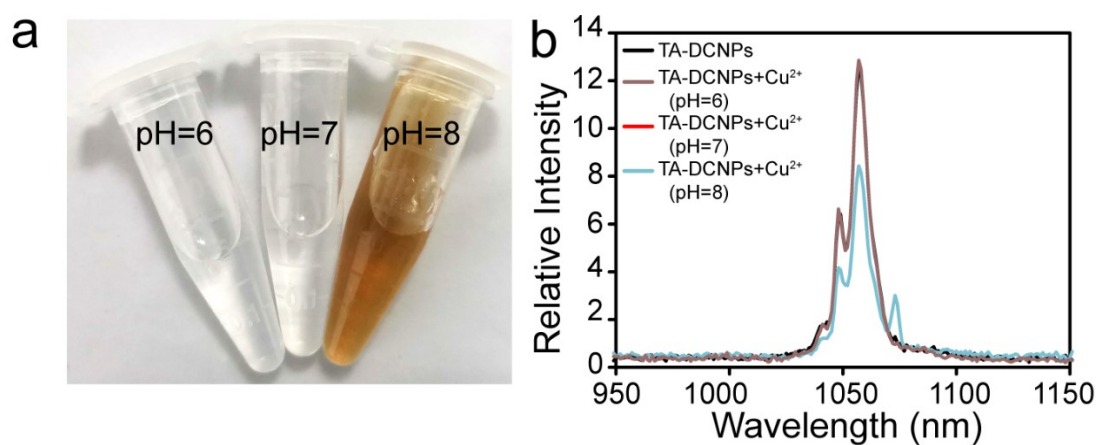

**Fig. S8** The (a) pictures and (b) NIR-II spectra of TA-DCNPs+Cu<sup>2+</sup> in PBS buffer with different pH values. The concentration of Cu<sup>2+</sup> was 2 mM.

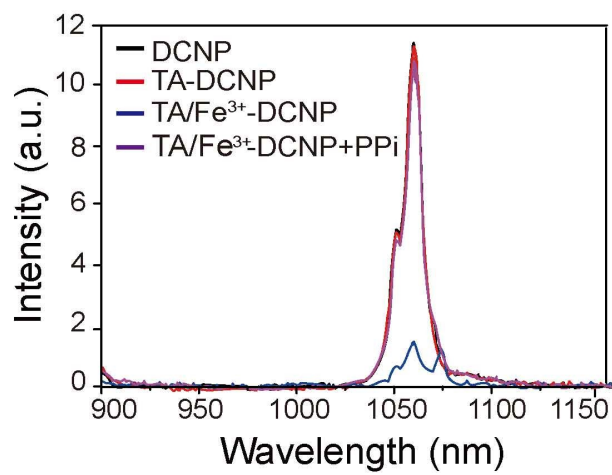

**Fig. S9** The luminescence spectra of DCNPs, TA-DCNPs, TA/  $\text{Fe}^{3+}$ -DCNPs and TA/  $\text{Fe}^{3+}$ -DCNPs + PPI (2 mM). Excitation wavelength: 808 nm.

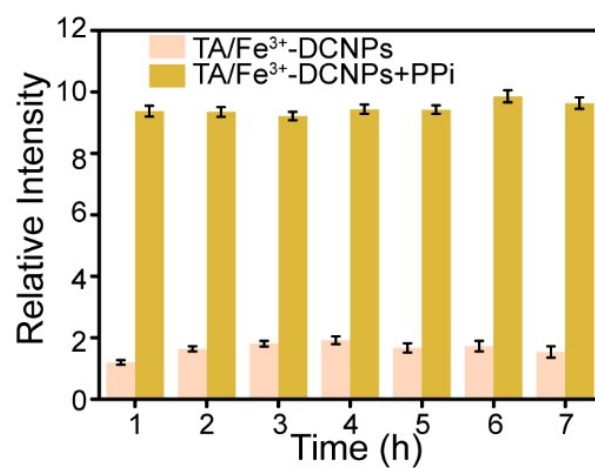

**Fig. S10** The variation of the luminescence intensity of the TA/Fe<sup>3+</sup>-DCNPs and TA/Fe<sup>3+</sup>-DCNPs + PPI after 1-7 h.

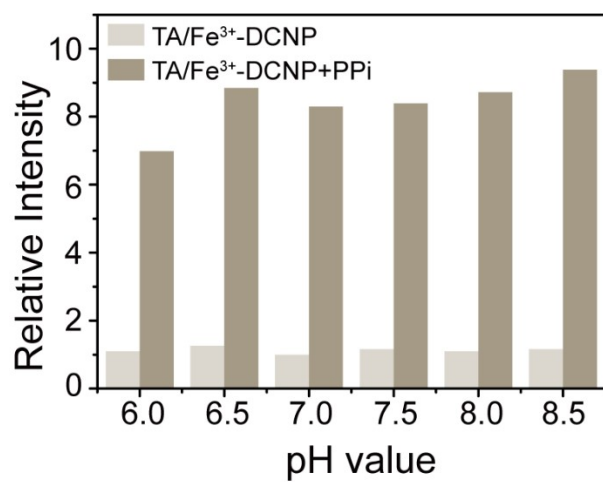

**Fig. S11** The luminescence intensity of TA/Fe<sup>3+</sup>-DCNPs and luminescence TA/Fe<sup>3+</sup>-DCNPs response to PPi in different pH environments (HEPES).

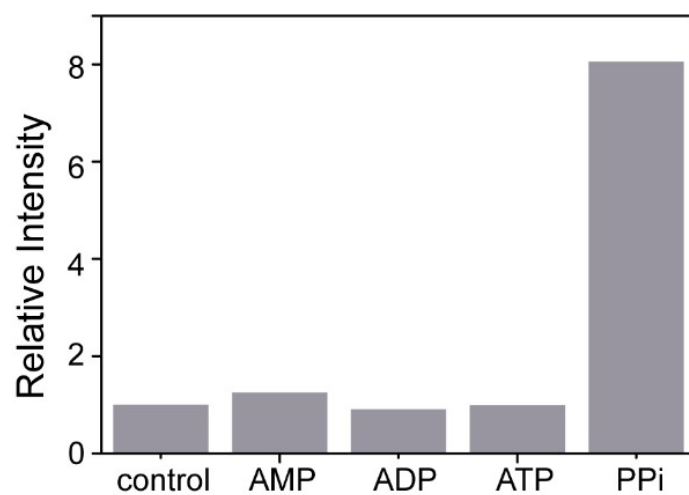

**Fig. S12** The luminescence responses of TA/Fe<sup>3+</sup>-DCNPs (0.2 mg·mL<sup>-1</sup>) in the presence of AMP, ADP and ATP (1 mM).

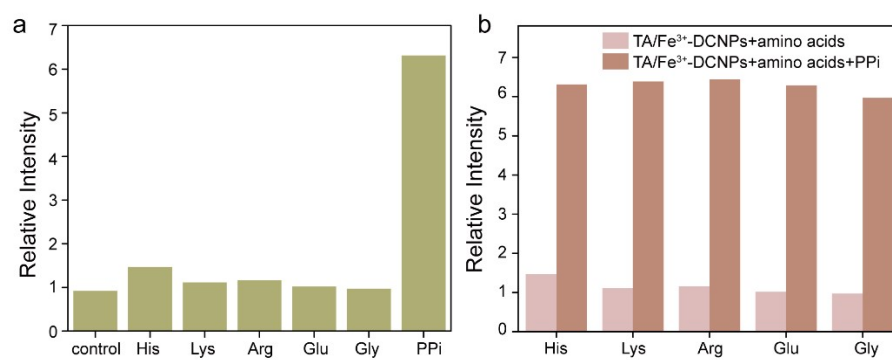

**Fig. S13** (a) The luminescence responses of TA/Fe<sup>3+</sup>-DCNPs (0.2 mg·mL<sup>-1</sup>) in the presence of several amino acids (1 mM). (b) The interference assay of the luminescence of TA/Fe<sup>3+</sup>-DCNPs with PPI in the presence of several amino acids.

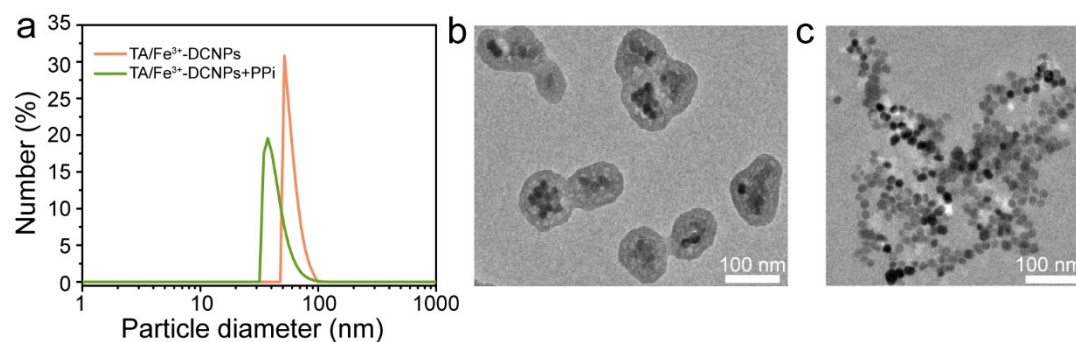

**Fig. S14** (a) The DLS measurements of TA/ Fe<sup>3+</sup>-DCNPs and TA/Fe<sup>3+</sup>- DCNPs + PPi. The TEM images of TA/ Fe<sup>3+</sup>-DCNPs (b) and TA/Fe<sup>3+</sup>- DCNPs + PPi (c).

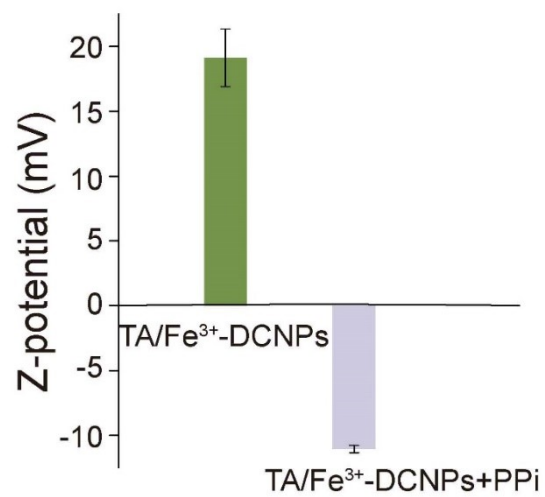

**Fig. S15** Z-potential of TA/ Fe<sup>3+</sup>-DCNPs and TA/ Fe<sup>3+</sup>-DCNPs + PPi.

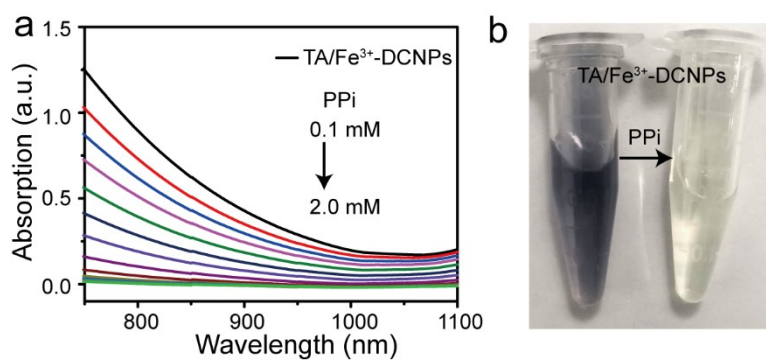

**Fig. S16** (a) The UV-vis spectra of TA/ Fe<sup>3+</sup>-DCNPs at different concentration of PPI. (b) The photos of TA/ Fe<sup>3+</sup>-DCNPs before and after added PPI.

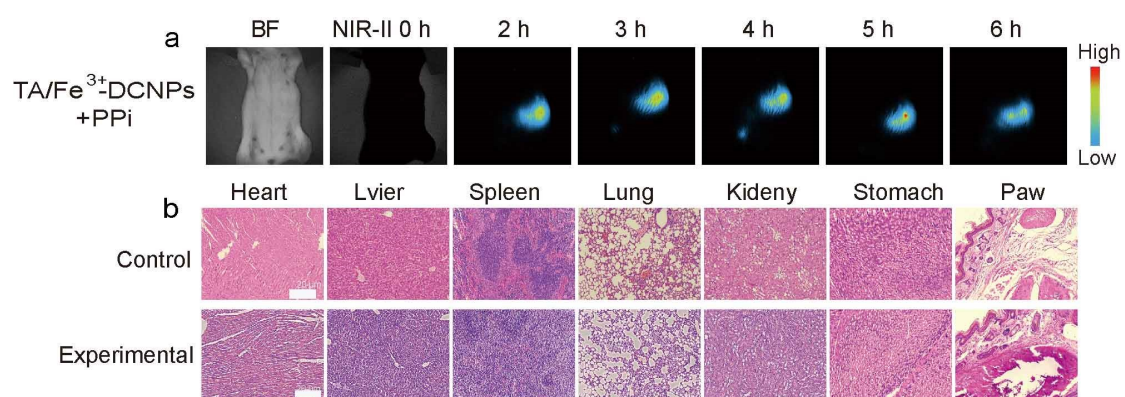

**Fig. S17** (a) *In vivo* luminescence images of the mice at different times after gastric lavage of TA/ Fe<sup>3+</sup>-DCNPs and PPI. (b) H&E images of organs from mice treated with PBS or TA/Fe<sup>3+</sup>-DCNPs + PPI (0.25 mg·kg<sup>-1</sup>), scale bars are 20  $\mu$ m.
